# Supplementary material for: Crystal growth of clathrate hydrates formed with methane + carbon dioxide mixed gas at the gas/liquid interface and in liquid water
Source: Royal Society of Chemistry journal article supplement (doi:10.1039/c5nj01080b), 2015-01-01
Supplement: c5nj01080b1.pdf [file c5nj01080b1.pdf]

# Supplementary Information for

## Crystal Growth of Clathrate Hydrates Formed with Methane + Carbon Dioxide Mixed Gas at Gas/liquid Interface and in Liquid Water

*Hiroki Ueno, Hotaka Akiba, Satoru Akatsu and Ryo Ohmura\**

Department of Mechanical Engineering, Keio University, Yokohama 223-8522, Japan

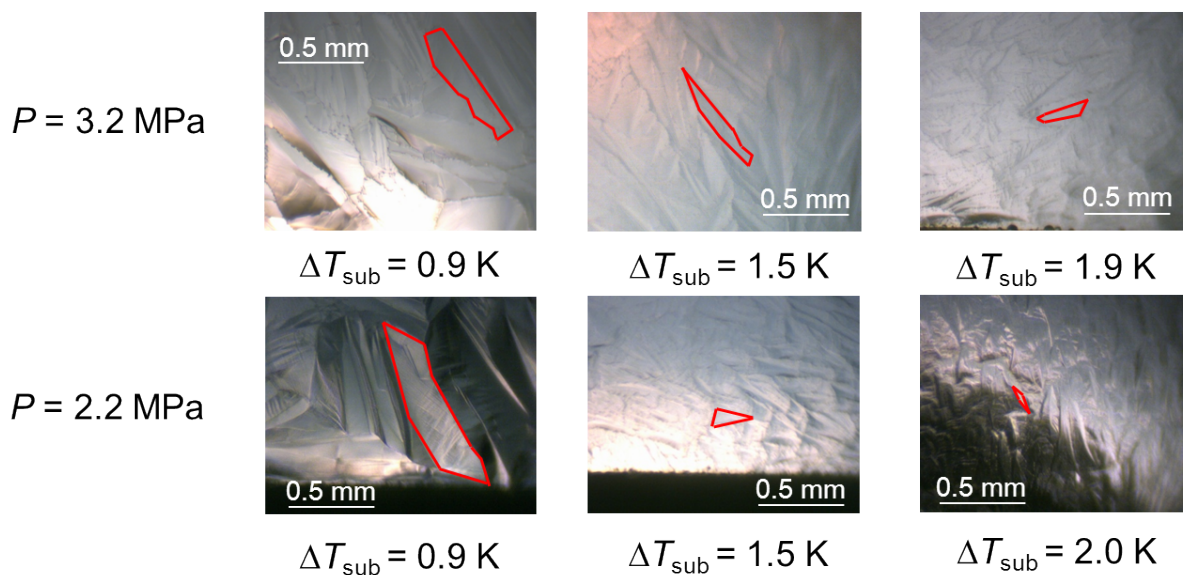

**Figure S1** Classification of  $\text{CH}_4 + \text{CO}_2$  (30:70) hydrate crystal morphology based on  $\Delta T_{\text{sub}}$ .

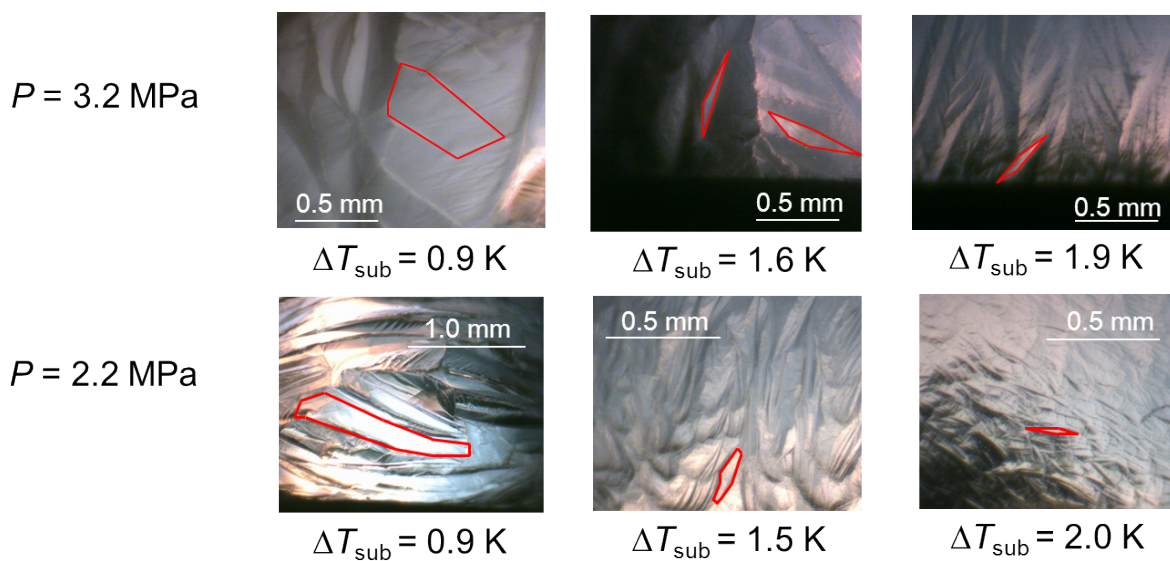

**Figure S2** Classification of  $\text{CO}_2$  hydrate crystal morphology based on  $\Delta T_{\text{sub}}$ .

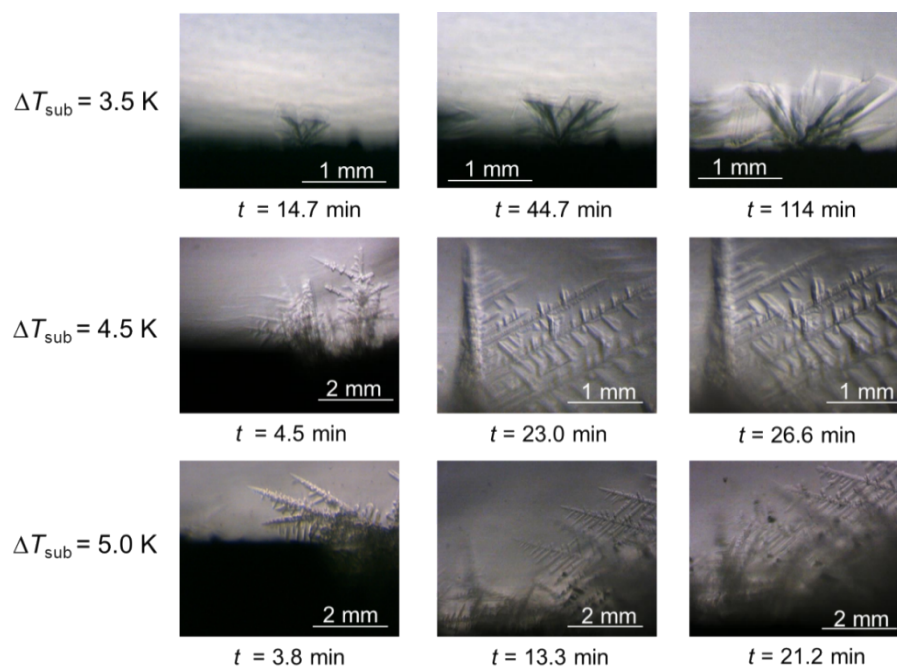

**Figure S3** Difference in hydrate growth depending on  $\Delta T_{\text{sub}}$  [mixed gas (30:70) system,  $P = 2.2$  MPa].

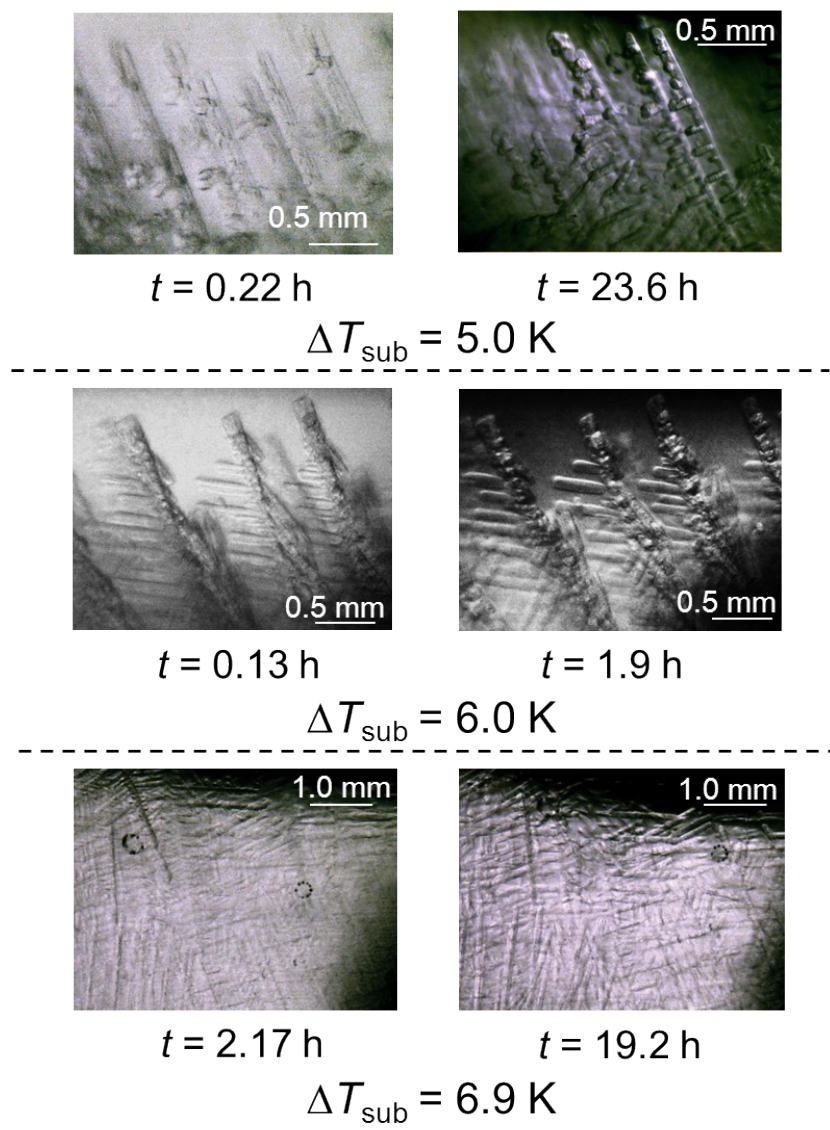

**Figure S4** Sequential images of the morphological changes in the system with  $\text{CH}_4 + \text{CO}_2$  (30:70) gas mixture,  $P = 3.2 \text{ MPa}$ .

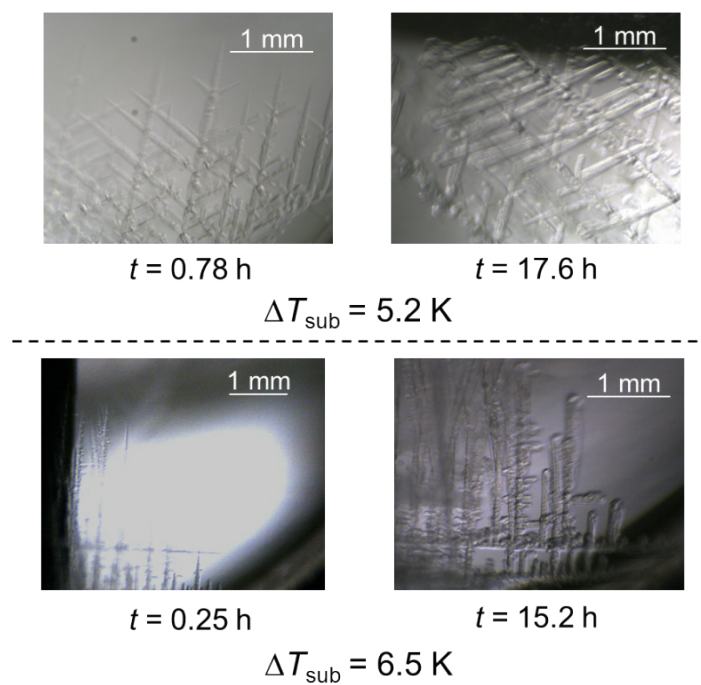

**Figure S5** Sequential images of the morphological changes in the system with  $\text{CH}_4 + \text{CO}_2$  (70:30) gas mixture,  $P = 3.2$  MPa.
